1 **Genomic and phenotypic characterization of experimentally selected resistant *Leishmania***  
2 ***donovani* reveals a role for dynamin-1 like protein in the mechanism of resistance to a**  
3 **novel anti-leishmanial compound**

4

5 Aya Hefnawy<sup>1</sup>, Gabriel Negreira<sup>1</sup>, Marlene Jara<sup>1</sup>, James A. Cotton<sup>2</sup>, Ilse Maes<sup>1</sup>, Erika D'  
6 Haenens<sup>1</sup>, Hideo Imamura<sup>1</sup>, Bart Cuypers<sup>1</sup>, Pieter Monsieurs<sup>1</sup>, Christina Mouchtoglou<sup>1</sup>, Hans  
7 De Winter<sup>3</sup>, Matt Berriman<sup>2</sup>, Mandy Sanders<sup>2</sup>, Julio Martin<sup>4</sup>, Geraldine de Muylder<sup>1</sup>, Jean-  
8 Claude Dujardin<sup>1,5</sup>, Yann G.-J. Sterckx<sup>6\*</sup>, Malgorzata Anna Domagalska<sup>1\*</sup>

9

10 <sup>1</sup> Molecular Parasitology Unit, Institute of Tropical Medicine, Antwerp, Belgium

11 <sup>2</sup> Wellcome Sanger Institute, Wellcome Genome Campus, Hinxton, UK

12 <sup>3</sup> Laboratory of Medicinal Chemistry, University of Antwerp, Belgium

13 <sup>4</sup> Global Health R&D, GlaxoSmithKline, Tres Cantos, Madrid, Spain

14 <sup>5</sup> Department of Biomedical Sciences, University of Antwerp, Belgium

15 <sup>6</sup> Laboratory of Medical Biochemistry and the Infla-Med Centre of Excellence, University of  
16 Antwerp, Belgium

17

18 \* Corresponding authors

19

20

21 **Abstract**

22 The implementation of prospective drug resistance (DR) studies in the R&D pipelines is a  
23 common practice for many infectious diseases, but not for Neglected Tropical Diseases.  
24 Here, we explored and demonstrated the importance of this approach, using as paradigms  
25 *Leishmania donovani*, the etiological agent of Visceral Leishmaniasis (VL), and TCMDC-  
26 143345, a promising compound of the GSK 'Leishbox' to treat VL. We experimentally  
27 selected resistance to TCMDC-143345 in vitro and characterized resistant parasites at  
28 genomic and phenotypic levels. We found that it took more time to develop resistance to  
29 TCMDC-143345 than to other drugs in clinical use and that there was no cross resistance to  
30 these drugs, suggesting a new and unique mechanism. By whole genome sequencing, we  
31 found two mutations in the gene encoding the *L. donovani* dynamin-1-like protein (LdoDLP1)  
32 that were fixed at highest drug pressure. Through phylogenetic analysis, we identified  
33 LdoDLP1 as a family member of the dynamin-related proteins, a group of proteins that  
34 impacts the shapes of biological membranes by mediating fusion and fission events, with a  
35 putative role in mitochondrial fission. We found that *L. donovani* lines genetically engineered  
36 to harbor the two identified LdoDLP1 mutations were resistant to TCMDC-143345 and  
37 displayed altered mitochondrial properties. By homology modeling, we showed how the two  
38 LdoDLP1 mutations may influence protein structure and function. Taken together, our data  
39 reveal a clear involvement of LdoDLP1 in the adaptation/resistance of *L. donovani* to  
40 TCMDC-143345.

41

42

43 **Importance**

44 Humans and their pathogens are continuously locked in a molecular arms race during which  
45 the eventual emergence of pathogen drug resistance (DR) seems inevitable. For neglected  
46 tropical diseases (NTDs), DR is generally studied retrospectively, once it has already been  
47 established in clinical settings. We previously recommended to keep one step ahead in the  
48 host-pathogen arms race and implement prospective DR studies in the R&D pipeline, a  
49 common practice for many infectious diseases, but not for NTDs. Here, using *Leishmania*  
50 *donovani*, the etiological agent of Visceral Leishmaniasis (VL), and TCMDC-143345, a  
51 promising compound of the GSK 'Leishbox' to treat VL, as paradigms, we experimentally  
52 selected resistance to the compound and proceeded to genomic and phenotypic  
53 characterization of DR parasites. The results gathered in the present study suggest a new DR  
54 mechanism involving the *L. donovani* dynamin-1 like protein (LdoDLP1) and demonstrate the  
55 practical relevance of prospective DR studies.

56

## 57 **Introduction**

58 The lifespan of any anti-microbial drug is, unfortunately, limited; its clinical use generally  
59 represents a new step in the arms race between human creativity and pathogen  
60 adaptability. Sooner or later, drug resistance (DR) or another phenotypic adaptation arises  
61 (1). Human countermeasures (such as new therapeutic regimens or combination therapy)  
62 can be adopted, but the drug will ultimately have to be replaced by a new compound, if any  
63 are available. Understanding the process of DR and developing strategies to counter it are  
64 particularly critical for neglected tropical diseases (NTDs), for which there are typically only a  
65 few drugs in the therapeutic arsenal and the R&D pipeline (2). It is essential to safeguard  
66 existing compounds and to develop new ones. At the same time, studies on molecular  
67 mechanisms of resistance are classically applied to understand the mode of action of  
68 antimicrobial agents, because of the possibility that the resistance determinants are caused  
69 by specific genetic variations resulting in the altered target binding to the drug molecule.

70 For NTDs, DR is generally studied retrospectively, once DR has already been established in  
71 clinical settings. In a recent opinion paper, we recommended to keep one step ahead in the  
72 arms race and implement prospective DR studies in the R&D pipeline, a common practice for  
73 many infectious diseases, but not for NTDs. Two specific recommendations have been given  
74 so far (2): (i) exploiting resources of parasite bio-banks to test the efficacy of novel  
75 compounds on a wider range of parasites, including recent isolates from clinically relevant  
76 settings for the prospective use of the compound -a practice shown to be highly relevant (3)-  
77 and (ii) experimentally selecting DR to new lead compounds and characterizing it broadly to  
78 assess the adaptive skills of the parasite to the compound, guide further drug development  
79 and help countering DR if it develops in clinical practice.

80 Here, using *L. donovani* (the etiological agent of Visceral Leishmaniasis, VL, which is fatal if  
81 left untreated) and TCMDC-143345, a promising anti-VL compound of the GSK 'Leishbox' (4)  
82 as paradigms, we experimentally selected resistance to the compound and proceeded to a  
83 genomic and phenotypic characterization of DR parasites. We found that it took more time  
84 to develop resistance to TCMDC-143345 than to other drugs in clinical use and that there  
85 was no cross resistance to these drugs, suggesting a new and unique mechanism. Whole  
86 genome characterization of independent TCMDC-143345-resistant lines highlighted two  
87 mutations in the gene encoding dynamin-1-like protein (LdoDLP1) that were fixed at highest  
88 drug pressure. Through phylogenetic analysis, we identified LdoDLP1 as a family member of  
89 the dynamin-related proteins (DRPs), a group of proteins that impacts the shapes of  
90 biological membranes by mediating fusion and fission events, with a putative role in  
91 mitochondrial fission. We genetically engineered our *L. donovani* strain to harbor the two  
92 identified LdoDLP1 mutations: parasites were resistant to TCMDC-143345 and displayed  
93 altered mitochondrial properties. The results are further supported by homology modeling  
94 which provides insights as to how the two LdoDLP1 mutations may influence protein  
95 structure and function. Taken together, the data presented in this paper reveal a clear  
96 involvement of LdoDLP1 in the adaptation/resistance of *L. donovani* to TCMDC-143345. Our  
97 results also demonstrate the practical relevance of prospective drug resistance studies to  
98 guide R&D pipeline and future clinical applications of that compound.

99

## 100 **Materials and Methods**

101

### 102 ***Parasites***

103 We used the *L. donovani* strain MHOM/NP/03/BPK282/0 clone 4 (further called  
104 LdBPK\_282 cl4, see growth conditions in suppl. text), originally derived from a Nepalese  
105 patient with confirmed VL and cryo-preserved at the Institute of Tropical Medicine, in  
106 Antwerp, Belgium. The strain is considered sensitive to antimonials [Sb<sup>III</sup>], Miltefosine  
107 [MIL] and Amphotericin B [AmphoB] and it was used for determining the reference  
108 genome of *L. donovani* (5). The strain kept most of its intrinsic phenotypic features, like  
109 virulence (5), transmissibility to sand flies (6) and natural drug susceptibility (7), thus  
110 constituting a good model for 'real-life' parasites that will be exposed to new drugs in  
111 natural conditions.

112

### 113 ***Selection of resistance and stability of resistance***

114 For the selection of resistance to TCMDC-143345, promastigotes were initially grown in  
115 quadruplicates (lines A, B, C, D) and later on because loss of lines A and B, line D was divided  
116 in 4, constituting a total of 5 lines (C, D1-D4). MIL was used as positive control for the  
117 experimental set-up of drug resistance selection and two duplicates were used (A and B). As  
118 negative controls, two additional lines were used: (i) the Wild-Type [WT] line LdBPK\_282 cl4  
119 maintained during the same passage numbers as the resistant lines but without the drug  
120 pressure and (ii) a WT line maintained with DMSO (which was used as solvent for TCMDC-  
121 143345). The resistant lines were maintained in the continuous presence of drugs, as  
122 described elsewhere (7). Increasing concentrations of drugs were added in a step-wise

123 manner until all lines grew at similar rates as wild-type parasites: (i) for MIL: 0, 2, 10, 15, 60,  
124 100  $\mu\text{M}$ , (ii) for TCMDC-143345, line C: 0, 0.2, 1, 2, 4, 5, 6, 8, 12 and 12  $\mu\text{M}$  and for line D: 0,  
125 0.2, 1, 2, 4, 5, 6, 10, 18 and 25  $\mu\text{M}$ . Each selection round was approximately 5 weeks (2  
126 passages per week) with the  $\text{IC}_{50}$  measured after each round. The selection flowchart is  
127 summarized in figure S1. To test the stability of the TCMDC-143345-resistant phenotype, the  
128 resistant line D1 was maintained for 20 weeks without drug pressure, after which the  $\text{IC}_{50}$   
129 was measured.

### 130 ***Promastigotes susceptibility tests***

131 Susceptibility tests were performed after each selection round (drug resistance selection) or  
132 after parasite engineering (CRISPR-Cas9 or over-expression, see below). The  $\text{IC}_{50\text{s}}$  were  
133 determined on logarithmic-stage promastigotes after 72 hours of exposure to TCMDC-143345  
134 or MIL with a resazurin assay as previously described (8) and summarized in Supplementary  
135 text. For the cross-resistance experiments the same protocol was used. The following  
136 maximal concentrations were used for the testing of the compounds: 50  $\mu\text{M}$  for TCMDC-  
137 143345 and compound Y, 400  $\mu\text{M}$  for MIL, 2 mM for  $\text{Sb}^{\text{III}}$  and 200  $\mu\text{M}$  for AmphoB. Ten  
138 points of 1 in 2 dilutions were used per compound. Four independent experiments were run  
139 with technical duplicates per experiment.

### 140 ***Amastigotes susceptibility tests***

141 Phorbol myristate acetate (30 nM) (PMA, Sigma) was added to THP-1 cells (human  
142 monocytic leukemia, ATCC-TIB-202, see maintenance conditions in supp. text) at 37°C for 48  
143 hours to differentiate these into adherent macrophages. Cells were washed and incubated  
144 with complete RPMI medium containing stationary phase (day 6) *L. donovani* promastigotes

145 at a macrophage/promastigote ratio of 1/30. After 5 h incubation at 37°C, non-internalized  
146 promastigotes were removed by 3 successive washes with PBS and infected macrophages  
147 were incubated with TCMDC-143345 in RPMI medium supplemented by 5% heat inactivated  
148 Horse serum for 96 h. TCMDC-143345 was tested with a starting concentration of 25 µM in a  
149 3-fold serial dilution. A 3-fold serial dilution of 3 µM amphotericin B was used as positive  
150 control. Experiments were done in triplicate with technical duplicates per experiment. For  
151 confocal microscopy, infected cells were washed with PBS, fixed for 30 minutes with 4%  
152 formaldehyde, rinsed again with PBS and stained with 4',6'-diamidino-2-phenylindole (DAPI  
153 300 nM). Images were acquired with an LSM 700 Zeiss confocal microscope. The number of  
154 infected macrophages and the number of amastigotes per infected macrophage were  
155 determined by manual counting. These numbers obtained from the average of counted wells  
156 were used to establish the infection index (% infected macrophages × amastigotes/infected  
157 macrophages). IC<sub>50s</sub> were calculated with GraphPad Prism using a sigmoidal dose-response  
158 model with variable slope.

159

### 160 ***DNA and library preparation for whole genome sequencing***

161 At each round of the resistance selection (5 weeks culture), parasites were harvested from  
162 lines C and D and from the two WT controls (maintained without and with DMSO). The list of  
163 samples sequenced is summarized in Table S1. DNA isolation was done using QIAamp DNA  
164 blood minikit (Qiagen), and the DNA concentration was assessed with the Qubit DNA broad-  
165 range DNA quantification kit (Thermo Fisher). Library preparation and sequencing of the  
166 different lines of the stepwise selection were performed at the Wellcome Sanger Institute  
167 (Hinxton, United Kingdom). Genomic DNA was sheared into 400–600-base pair fragments by



168 focused ultrasonication (Covaris Adaptive Focused Acoustics technology, AFA Inc., Woburn,  
169 USA). Amplification-free indexed Illumina libraries were prepared (9) using the NEBNext  
170 Ultra II DNA Library Prep kit (New England BioLabs). The libraries were quantified using the  
171 Accuclear Ultra High Sensitivity dsDNA Quantitative kit (Biotium) and then pooled in  
172 equimolar amounts. Paired end reads of 150-bp were generated on the Illumina HiSeq X10  
173 according to the manufacturer's standard sequencing protocol (10). Data Release: raw data  
174 was deposited in the European Nucleotide Archive (ENA) with the accession number  
175 ERS441806-ERS441816.

176

### 177 ***Whole genome sequencing data analysis***

178 Somy, single nucleotide polymorphisms (SNPs), local copy number variations (CNVs) and  
179 Indels were determined as described elsewhere (5),(11) using the BPK282v2 PacBio  
180 reference genome (5); more details can be found in supplementary text. SNPs and small  
181 indels were considered significantly different between parasite lines when the allele  
182 frequency showed difference of at least 0.25 and Mann–Whitney U test p-value <0.05 (12).  
183 Allele frequency shifts larger than 0.80 were considered homozygous variants. We used one  
184 criterion to evaluate whether a gene or chromosome copy number difference was  
185 biologically meaningful and statistically significant: the absolute difference in  
186 gene/chromosome copy number should be at least 0.5 to be significant. Gene ontology  
187 analyses were done as explained in supplementary text. Heat maps were created using the  
188 heatmap3 package in R (R Development Core Team 2015). Reasoning that mutations away  
189 from the sensitive parental strain at causative loci were likely to contribute to resistance but  
190 that multiple variants in the same loci could contribute to the resistance phenotype, we

191 adopted a simple approach to identify significant loci informed by burden tests used in rare-  
192 variant association studies (13). We summed the non-reference allele frequency of variants  
193 at each locus for each sequence sample and tested for association by regression of these  
194 total allele frequencies per locus against the measured  $IC_{50}$  for that sample.

195

### 196 ***CRISPR-Cas9 mediated engineering of Leishmania***

197 LdBPK\_282 cl4 parasites were transfected with the linearized pTB007 vector, obtained from  
198 Dr. Eva Gluenz (University of Oxford, UK) (14). Transgenic parasites were selected with  
199 25 $\mu$ g/mL Hygromycin starting 24h after transfection and a clone was isolated using a micro-  
200 drop method (15). In order to introduce the Ala324Thr or the Glu655Asp mutation using the  
201 CRISPR-Cas9 system, the single guide RNAs (sgRNAs) DynMut1-gRNA and DynMut2-gRNA  
202 were designed targeting the sequences CAGCAGCTGTGCAGTGGGCT and  
203 GGCACTGCTCTCCGAGGCCCCC respectively (sites of mutation are underlined). The sgRNA  
204 templates for in vivo transcription were generated by PCR as previously described (14). The  
205 sequence of all primers used in this work are provided in Table S2. For each mutation, a  
206 double-stranded donor DNA bearing the missense mutation was generated by annealing of  
207 synthetic oligos. The DNA repair templates also included synonymous nucleotide  
208 substitutions to distinguish the CRISPR-Cas9-mediated mutations from potential naturally  
209 occurring mutations. The Ala324Thr and the Glu655Asp mutations were independently  
210 recreated by transfecting the respective sgRNA template and donor dsDNA using the Basic  
211 Parasite Nucleofector<sup>TM</sup> Kit 1 (Lonza) with the U-033 program following manufacturer  
212 recommendations. Control transfections were made by transfecting either each donor  
213 dsDNA without their respective sgRNA templates or by replacing each donor dsDNA by the

214 DynWT1 or DynWT2 dsDNAs, which lack the missense mutation. After 24h post transfection,  
215  $10^6$  parasites of each transfection were transferred to a 24-wells plate in a final volume of  
216 1mL/well of HOMEM medium with 20% Fetal Bovine Serum and  $9\mu\text{M}$  of TCMDC-143345 or  
217 0,1% DMSO (control). Plates were incubated at  $26^\circ\text{C}$  for 12 days and cell viability was  
218 determined by flow cytometry using the NucRed<sup>TM</sup> Dead 647 ReadyProbes<sup>TM</sup> and the  
219 Vybrant<sup>TM</sup> DyeCycle<sup>TM</sup> Green dyes (ThermoFisher). Parasites that survived and grew in the  
220 presence of TCMDC-143345 were transferred to culture flasks and kept under pressure with  
221  $6\mu\text{M}$  of TCMDC-143345 for 2 passages, when clones were isolated with a microdrop method  
222 (15) and grown in absence of drug pressure.

223

#### 224 ***Over-expression of WT LdoDLP1 gene in Lines C and D3***

225 The wild-type LdoDLP1 gene was PCR-amplified from the gDNA of LdBPK\_282 cl4 with the  
226 primers InF-LdDNM1-F and InF-LdDNM1-R and cloned in the *NotI* and *NcoI* sites of the  
227 pLEXSy-Hyg2.1 expression vector (Jena Bioscience). The plasmid was linearized with the *SwaI*  
228 enzyme and transfected in parasites of fully resistant Lines C and D3, as well as the standard  
229 LdBPK\_282 cl4 using the Basic Parasite Nucleofector<sup>TM</sup> Kit 1 (Lonza) with the U-033 program.  
230 The empty, linearized pLEXSy-Hyg2.1 vector was also transfected in each line as control.  
231 Parasites were selected and maintained with  $50\mu\text{g}/\text{mL}$  Hygromycin after 24h post-  
232 transfection.

233

#### 234 ***Phylogenetic analysis***

235 The amino acid sequences of several DRPs (see details in supplementary text) were aligned  
236 using MAFFT (16) to generate a sequence alignment from which a rooted phylogenetic tree

237 was constructed through the maximum-likelihood method using PHYML (17). *Escherichia coli*  
238 CrfC, which shares features with the DRP family members, was employed as an outgroup to  
239 root the phylogenetic tree. The reliability of the tree was verified by performing 1000  
240 bootstrap replicates.

241

#### 242 ***Mitochondrial membrane potential and cell viability***

243 [i] Selected resistant lines C and D3, together with DMSO control with same number of  
244 passages as well as [ii] CRISPR-engineered mutants, together with the WT Line and the WT  
245 transfected with the CRISPR-Cas9 and called pT007 (both used as controls) were cultivated  
246 at a density of  $1 \times 10^6$  without or with 12.5  $\mu\text{M}$  of TCMDC-143345. On days 2, 4 and 7 the  
247 mitochondrial membrane potential (MtMP) and cell viability were co-evaluated with the  
248 Mitotracker DeepRed and NucGreen respectively (Thermo Fisher Scientific). Briefly, 1  
249 volume of parasites was incubated with 2 volumes of a medium containing 0.1  $\mu\text{M}$  of cell  
250 tracker Deep Red and 1 drop/mL of NucGreen. The samples were incubated for 15 min at 26  
251  $^{\circ}\text{C}$  and subsequently re-pelleted by centrifugation at 1500 g per 5 min. The cells were  
252 resuspended in new medium and analysed by flow cytometry (BD FACS Verse) in the  
253 medium flow rate mode. An unstained sample was included in each experiment as negative  
254 control for the establishment of the autofluorescence and the gates for the selection of the  
255 population positive and negative for both fluorochromes.

256

#### 257 ***Homology modeling***

258 A homology model for the LdoDLP1 dimer was generated using MODELLER (18) with the  
259 following crystal structures as templates: *Homo sapiens* DLP1 (Uniprot ID O00429, PDB ID  
260 4BEJ) (19), *Rattus norvegicus* DNM1 (Uniprot ID P21575, PDB ID 3ZVR)(20), *H. sapiens* DNM3  
261 (Uniprot ID Q9UQ16, PDB ID 5A3F) (21) and *H. sapiens* DNM1 (Uniprot ID Q05193, PDB ID  
262 3SNH) (22). The homology model has zDOPE and GA341 scores of -0.255 and 1.000,  
263 respectively, thereby indicating its reliability. Molecular graphics visualization and analysis  
264 were performed with UCSF ChimeraX (23).

265

266 **Results**

267 ***Experimental resistance of promastigotes to TCMDC-143345 takes 50 weeks to establish, is***  
268 ***stable, and is maintained in amastigotes.*** To assess the ability of parasites to adapt to  
269 TCMDC-143345 we set up an experimental resistance experiment in quadruplicates for  
270 TCMDC-143345 (Line A, B, C, and D), starting with 0.2  $\mu\text{M}$  and for comparison we used  
271 Miltefosine (MIL) pressure in duplicates (lines A and B) starting with 2  $\mu\text{M}$ . For TCMDC-  
272 143345, two lines (A and B) were lost during the selection process after round 4. The  
273 selection was continued from round 5 with line C and lines D1-D4, generated by splitting the  
274 original line D at this round (Fig. S1, Table S1).

275 The first parameter to be evaluated was the time to resistance (7), which was defined as the  
276 time needed for each line to display a wild-type (WT) growth curve in the presence of the  
277 highest selection pressure following the stepwise selection process. The selection dynamics  
278 for various lines are shown in Figure 1A. It took 10 selection rounds (time to resistance of  
279 approximately 50 weeks) for line D1 to reach the highest TCMDC-143345  $\text{IC}_{50}$  (55  $\mu\text{M}$ ). In  
280 comparison, the  $\text{IC}_{50}$  of TCMDC-143345 for the WT line maintained without drug pressure for  
281 the same time was 2-3  $\mu\text{M}$ . The selection dynamics for line C was rather different from line  
282 D1 and the resistance selection was not complete even after 10 rounds, thereby implying a  
283 longer time to resistance. At round 5 of the selection, line C was not adapting well, which is  
284 why the pressure was decreased. The highest  $\text{IC}_{50}$  achieved was 15  $\mu\text{M}$  at round 9. For the  
285 remaining D replicates, line D3 had a similar resistance profile as line D1 while for lines D2  
286 and D4 the selection had to be stopped one round earlier ( $\text{IC}_{50}$  ranging between 16 and 25  
287  $\mu\text{M}$ , Fig. S1) due to the limited availability of TCMDC-143345.

288 To place these results into context, the time to resistance for MIL was assessed in parallel,  
289 and was about 30 weeks (6 selection rounds), with a shift of the  $IC_{50}$  from 13  $\mu$ M to 100  $\mu$ M.  
290 We added for comparison, data from our previously published study with the same  
291 LdBPK\_282 cl4 strain, in which we showed that the time to resistance to trivalent  
292 antimonials was 20 to 5 weeks (depending on the selection protocol) (7). Fig 1B shows  
293 clearly that the time to resistance was the longest for TCMDC-143345. The second evaluated  
294 parameter was the stability of the resistance phenotype. Both the WT line and Line D1 were  
295 maintained for 20 weeks without drug pressure and then challenged again with TCMDC-  
296 143345. From Fig. S2A, it can be observed that the withdrawal of the drug pressure for a  
297 prolonged period of time did not alter the susceptibility of line D1 to TCMDC-143345 ( $IC_{50}$   
298  $>25 \mu$ M). Thirdly, the susceptibility of intracellular amastigotes was assessed. TCMDC-  
299 143345 pressure was applied on THP-1 macrophages infected with line D1. Intracellular  
300 amastigotes of line D1 showed an  $IC_{50}$  of 30  $\mu$ M versus 2  $\mu$ M for the WT, confirming that the  
301 resistance selected at the promastigote stage was maintained at the amastigote stage (Fig.  
302 S2B). Fourthly, promastigotes of the resistant line D1, WT and D1-no drug (D1 line  
303 maintained for 20 weeks without drug pressure) were tested for their susceptibility to  
304 known antileishmanial compounds (MIL, Ampho B and  $Sb^{III}$ ) as well as one novel compound  
305 (Compound Y) that has a chemical structure related to TCMDC-143345. No cross-resistance  
306 was observed for Ampho B and  $Sb^{III}$  with similar  $IC_{50}$  values observed for all lines (Fig. S2C &  
307 E). There was increased susceptibility of the TCMDC-143345-resistant lines to MIL (Fig. S2D).  
308 Interestingly, all TCMDC-143345-resistant lines showed higher  $IC_{50}$  values for compound Y  
309 compared to the WT, thereby implying cross-resistance of the TCMDC-143345-resistant lines  
310 to compound Y (Fig. S2F). All  $IC_{50}$  values are shown in Data S1A. Finally, we looked at the *in*  
311 *vitro* fitness of the TCMDC-143345-resistant promastigotes in the absence of the drug. The

312 resistant lines had a moderated but significant lower rate of growth than the wildtype (Fig.  
313 S2G and supplementary text): C was the most slowly growing line.

314

315 ***Missense mutations in the gene encoding the dynamin-1 like protein LdoDLP1 can be found***  
316 ***in independent selected resistant lines to TCMDC-143345***

317 To identify genetic changes underlying the observed resistance to TCMDC-143345, we  
318 applied whole-genome sequencing (WGS) and we characterized genomic changes of nuclear  
319 DNA in the control WT and the resistant C and D1 lines at all steps of the selection process  
320 (see Fig. S1). First, we analyzed changes at the level of nucleotide sequence, *i.e.* single  
321 nucleotide polymorphisms (SNPs), and small insertion and deletions (INDELs). A total of 245  
322 SNP variants not present at the start of drug selection were identified in all the lines (Data  
323 S1B). Among these, only 2 missense mutations with large and statistically significant changes  
324 in allele frequency were observed in line C (Fig. 2A & 2C). The first one appeared at 5  $\mu$ M  
325 TCMDC-143345 with a gradual increase in the allele frequency from 0 to 1 in  
326 LdBPK\_290029300, the gene encoding dynamin-1 like protein (LdoDLP1). This C:T missense  
327 mutation translates to a change from alanine at position 324 to threonine (Ala324Thr). The  
328 second significant change in the allele frequency in line C concerns another missense  
329 mutation G:T in chr6; the allele frequency shifts to 0.5 at 4  $\mu$ M TCMDC-143345 in a  
330 conserved hypothetical protein (LdBPK\_060013600) and stabilizes around 0.7 during further  
331 selection. Only one missense mutation with a significant change in the allele frequency has  
332 been observed in all D lines (Fig. 2B). It starts at 6  $\mu$ M TCMDC-143345, changes from 0 to 1  
333 and stays stable until the end of the selection pressure. Intriguingly, that mutation is also in  
334 the gene encoding LdoDLP1 (LdBPK\_290029300), but results in a different change at the  
335 amino acid level compared to the LdoDLP1 mutation found in Line C; *i.e.*, glutamate at



336 position 655 changes to aspartate (Glu655Asp). These results were supported by using a  
337 testing approach inspired by burden tests for rare disease associations, confirming that the  
338 number of mutations in this gene is the most highly correlated with  $IC_{50}$  (see supplementary  
339 text and Fig. S3). No significant indels were detected in lines C or D(1-4) along the selection  
340 pressure.

341 As we previously showed that aneuploidy and local copy number variations (CNVs) occur at  
342 an early stage of the selection process (8), we wondered whether it would be case in this  
343 experiment. Aneuploidy was already present before selection, but additional aneuploid  
344 chromosomes were observed around 4-6  $\mu$ M TCMDC-143345 and final patterns of  
345 aneuploidy at the end of selection were rather different between Lines C and D1 (Fig. 3). Few  
346 CNVs were observed and the most striking were amplifications/deletions of large  
347 subtelomeric chromosomal stretches, also line-specific: in chr17 (D1) and chr30 (C) (Fig.S3B-  
348 C). More details on the aneuploidy and CNVs can be found in supplementary text.

349

350 ***The CRISPR-Cas9-mediated mutants and overexpression lines confirm the role of LdoDLP1***  
351 ***in the resistance to TCMDC-143345***

352 As the only common missense mutation in the two independent resistant lines was found in  
353 LdoDLP1, we hypothesized that the genetic variation in this gene is responsible for the  
354 TCMDC-143345 resistance. To test this hypothesis, we recreated the identified mutations in  
355 wild-type promastigotes by means of a modified CRISPR-Cas9 system described elsewhere  
356 (14) and we analyzed their resistance to TCMDC-143345. Detailed results of selection of  
357 transfected promastigotes and subsequent controls are shown in Supplementary text. Three  
358 clones were derived from each of the selected line (bearing the artificially introduced

359 Ala324Thr or Glu655Asp mutations). The 6 clones were then submitted to a susceptibility  
360 test using a resazurin assay. The CRISPR-Cas9 engineered clones displayed a 4 to 5-fold  
361 increase in  $IC_{50}$  to TCMDC-143345 when compared to the WT LdBPK\_282 cl4 or the uncloned  
362 parasites from control transfections #2 and #7 with a donor DNA lacking the missense  
363 mutations (DynWT1 and DynWT2 respectively - One-way ANOVA,  $P < 0.001$ ), achieving an  
364  $IC_{50}$  similar to Line C (Fig. 4A). Both the Ala324Thr (DynMut1 = mutation of line C) and the  
365 Glu655Asp (DynMut2 = mutation of line D) mutations had similar impacts on susceptibility to  
366 TCMDC-143345. Notably, no mutant clone displayed an  $IC_{50}$  similar to Line D.

367 In parallel to the CRISPR-Cas9-induced mutagenesis experiment, we also investigated the  
368 effect of over-expressing the wild type LdoDLP1 gene in lines C and D3. The transfection of  
369 an over-expression vector containing the wild type form of the gene completely abrogated  
370 resistance to TCMDC-143345 in Line C, reducing their  $IC_{50}$  to levels similar to the wild type  
371 LdBPK\_282 cl4 (Fig. 4B - One-way ANOVA,  $P < 0.001$ ). In line D3 however, while a significant  
372 reduction in  $IC_{50}$  was observed (One-way ANOVA,  $P < 0.001$ ), parasites still demonstrated  
373 resistance to the compound, with an average  $IC_{50}$  of 29  $\mu$ M. Altogether these results indicate  
374 that the mutations in the LdoDLP1 constitute the major genetic changes responsible for the  
375 observed resistance to TCMDC-143345 in both lines. Growth curves in the absence of drug  
376 pressure showed a similar growth rate between DynMut1 and DynMut2 and pT007 control,  
377 the WT line, which constitutively expresses Cas9 protein (Fig.S2H and supplementary text).

378

### 379 ***Phylogenetic analysis suggests that LdoDLP1 plays a role in mitochondrial fission***

380 LdoDLP1 belongs to the family of dynamin-related proteins (DRPs), a group of proteins that  
381 impacts the shapes of biological membranes by mediating fusion and fission events. Given

382 the i) clear contributions of the Ala324Thr and Glu655Asp LdoDLP1 mutations to the TCMDC-  
383 143345 resistance phenotype and ii) the absence of detailed biochemical studies on  
384 leishmanial DRPs, a phylogenetic analysis was performed in order to learn more about the  
385 protein's possible biological function. As was reported by Morgan and colleagues in their  
386 work on *Trypanosoma brucei* DLP1 (24), a sequence alignment followed by the construction  
387 of a rooted phylogenetic tree reveals that DRPs fall into different functional clades.  
388 Interestingly, LdoDLP1 clusters together with *T. brucei* DLP1 into the clade of DRPs involved  
389 in mitochondrial fission, (Figure S4), suggesting a role for LdoDLP1 in this biological process.

390

391 ***TCMDC-143345 resistant lines exhibit lower mitochondrial membrane potential compared***  
392 ***to susceptible, wild-type parasites***

393 It has been well established that mitochondrial dynamics plays a role in the maintenance of  
394 normal mitochondrial membrane potential (MtMP) and cellular respiration (25)(26). Given  
395 the putative role of LdoDLP1 in mediating mitochondrial fission, we therefore evaluated  
396 whether the parasite lines containing LdoDLP1 mutations displayed changes in their  
397 mitochondrial activity. The MtMP and cell viability were simultaneously evaluated on  
398 logarithmic (day 2), early stationary (day 4) and late stationary promastigotes (day 7). In the  
399 presence or absence of TCMDC-143345 the overall trend was that cells with good viability in  
400 DR lines had decreased MtMP in comparison to the WT during the three days of testing  
401 (Two-way RM ANOVA,  $P < 0.001$ ) (Fig 5A-B). However, the differences between WT and DR  
402 lines were bigger in logarithmic parasites (Fisher's LSD test,  $P$  values  $< 0.0001$ ) both in  
403 presence or absence of TCMDC-143345. Noteworthy, also on day2 the drug pressure  
404 dramatically alters the Mitotracker RFUs in the WT but barely in the case of resistant lines  
405 (see scatters plots Fig.5 A). We further evaluated if the CRISPR-engineered lines bearing the

406 mutations Ala324Thr (DynMut1) and Glu655Asp (DynMut2) in LdoDLP1 had also diminished  
407 MtMP and it was confirmed for both mutations. Moreover, as with the *in vitro* selected DR  
408 lines the differences between LdoDLP mutant lines and the WT were larger during the  
409 logarithmic phase (Fig. S5). These results overall confirm that the resistant lines containing  
410 LdoDLP1 mutations have higher survival rate with the cost of moderate but significant  
411 decrease of the MtMP.

412

413 ***Homology modeling suggests a molecular basis for the putative impact of the Ala324Thr***  
414 ***and Glu655Asp mutations on LdoDLP1 function***

415 Given that the introduction of the LdoDLP1 Ala324Thr and Glu655Asp point mutations  
416 bestows TCMDC-143345 resistance onto the parasite and leads to an altered mitochondrial  
417 membrane potential, a structural model for LdoDLP1 was generated through homology  
418 modeling in an attempt to provide a molecular basis for these observations. LdoDLP1  
419 contains all structural features characteristic of DRPs (Fig. 6, panel A): a neck domain (aka  
420 bundle-signaling element or BSE) consisting of three  $\alpha$ -helices, a GTPase domain, an  $\alpha$ -helical  
421 stalk domain that contains the dimerization interface, and a foot domain (aka 'paddle' or  
422 pleckstrin homology or PH domain). In contrast to various other DRPs, LdoDLP1 is devoid of  
423 the intrinsically disordered proline-rich domain (PRD).

424 The Ala324Thr mutation maps onto a part of the stalk domain that is closely located to the  
425  $\alpha$ 2-helix of the neck domain (Fig. 6B) and is known to be responsible for the higher-order  
426 oligomerization of DRP dimers, which is important for DRP function in fission events ((27)  
427 (28) (21) (29), more in-depth explanation in the Supplementary text). The Glu655Asp  
428 mutation is located in a region known as 'Hinge 1', which connects the stalk domain with the

429  $\alpha$ 3-helix of the neck domain (Fig. 6, panel B). ‘Hinge 1’ confers flexibility to DRPs, which is  
430 crucial for the so-called “hydrolysis-dependent powerstroke” underlying protein function  
431 ((29) (30) (31), more in-depth explanation in the Supplementary text). Hence, the LdoDLP1  
432 mutations contributing to TCMDC-143345 resistance could i) alter the tendency of LdoDLP1  
433 dimers to form higher-order oligomers (Ala324Thr) and ii) have a considerable impact on the  
434 flexibility of LdoDLP1’s ‘Hinge 1’ region (Glu655Asp), which would in turn be expected to  
435 affect protein function.

436

## 437 **Discussion**

438 Humans and their pathogens are continuously locked in a molecular arms race and human  
439 interventions like chemotherapy have a further impact on parasites adaptations and  
440 counter-adaptations (1). This is well illustrated by the present study in which we (i) selected  
441 in *L. donovani* resistance to TCMDC-143345, a novel and potent anti-leishmanial compound  
442 that emerged from the Leishbox library of anti-leishmanial compounds (4) and (ii)  
443 characterized the extent of adaptations developed by the parasite.

444 Ten selection rounds (about 50 weeks) were necessary to obtain resistance to TCMDC-  
445 143345 in promastigotes, resistance was stable in the absence of the drug and it was also  
446 maintained in intracellular amastigotes. The same LdBPK\_282 cl4 line was previously used  
447 for selecting and characterizing resistance to drugs used in clinical practice, hereby allowing  
448 comparisons about development of resistance to different compounds. Overall, it took more  
449 time to develop resistance *in vitro* to TCMDC-143345 (10 rounds, 50 weeks) than to MIL  
450 (present study, 6 rounds, 30 weeks) and to Sb<sup>III</sup> (1-4 selection rounds or 5-20 weeks,  
451 depending on the protocol used)(7).

452 Whole genome sequencing is a powerful tool to identify molecular changes accompanying  
453 DR development in pathogens (7)(8, 32). In this study, in-depth genomic analysis revealed  
454 that TCMDC-143345 resistant lines were characterized by several aneuploidy changes, CNVs  
455 (see discussion in supplementary text) and SNPs. Especially the SNP analysis during the  
456 development of resistance turned out to be very informative. Out of 245 detected SNPs, only  
457 2 missense mutations were fixed in 2 independent resistant lines and both are located in the  
458 gene encoding *L. donovani* dynamin-1 like protein (LdoDLP1). We used CRISPR-Cas9 to  
459 recreate the Ala324Thr or the Glu655Asp mutations in the LdoDLP1 gene of WT LdBPK\_282  
460 cl4 promastigotes. Hereby, we demonstrated that these mutations independently confer  
461 resistance to TCMDC-143345, leading to an IC<sub>50</sub> in all mutant clones that is similar to Line C.  
462 Consistent with this, the over-expression of the WT LdoDLP1 gene completely abolished  
463 resistance to TCMDC-143345 in line C, while it had only a partial impact in the IC<sub>50</sub> of line D3.  
464 These observations demonstrate that a loss-of-function mutations in LdoDLP1 gene are  
465 sufficient to provide a resistance to TCMDC-143345 in both lines. However, in line D this  
466 resistance is further increased by other uncharacterized modifiers acting in concert with the  
467 mutation in the LdoDLP1. Further work is needed to explore the functional impact of the  
468 specific aneuploidy changes, CNVs and SNPs observed in that line.

469 LdoDLP1 belongs to the family of dynamin-related proteins (DRPs) which are involved in  
470 several functions(24)(26): i) mitochondrial fusion (fusion of the inner mitochondrial  
471 membrane), ii) membrane dynamics of the outer chloroplast membrane, iii) endocytosis and  
472 vesicle trafficking in animals, iv) vesicle trafficking in plants, v) mitochondrial fission (fission  
473 of the outer mitochondrial membrane), and vi) plate formation and cell division in plants.  
474 DRPs cluster in different phylogenetic clades according to these functions(24) and our  
475 phylogenetic analysis showed a clear clustering of LdoDLP1 into the DRP clade involved in

476 mitochondrial fission. The combined actions of mitochondrial fission and fusion govern  
477 mitochondrial dynamics, which underlie the organisation, copy number, form and function  
478 of mitochondria. The rates of these events are regulated according to the metabolic and/or  
479 developmental needs of the cell and in response to cellular stress or damage. While  
480 mitochondrial dynamics and cell division are not necessarily coupled in eukaryotes, the link  
481 between both processes seems to be very stringent in apicomplexan and kinetoplastid  
482 parasites. Both Apicomplexans and Kinetoplastids contain a single mitochondrion of which  
483 the fission is controlled by a single or a limited number of DLPs (33)(34). *Trypanosoma brucei*  
484 harbours two DLP paralogs (TbDLP1 and TbDLP2) (35), of which especially TbDLP1 seems to  
485 play a central role in linking the processes of mitochondrial fission, cytokinesis, and  
486 distribution of kinetoplastid DNA(24, 36–38). Interestingly, abrogation of TbDLP1 function in  
487 *T. brucei* blocks mitochondrial fission and cell division, again leading to parasite fatality(24,  
488 36). Similar to other protozoan parasites, *Leishmania* spp. contain a single elongated  
489 mitochondrion and harbor a single DLP (24).

490 The clear clustering of LdoDLP1 with *T. brucei* DLP1 into the DRP clade involved in  
491 mitochondrial fission hinted towards a role for LdoDLP1 in mitochondrial dynamics, which is  
492 why we studied the mitochondrial membrane potential and cell viability of the TCMDC-  
493 143345 resistant parasite lines. In accordance with a proposed role of LdoDLP1 in  
494 mitochondrial fission, we found that all the TCMDC-143345-resistant lines (including the  
495 CRISPR-Cas9 generated LdoDLP1 Ala324Thr and Glu655Asp mutants) showed an altered  
496 mitochondrial activity. Interestingly, homology modeling suggests that the LdoDLP1  
497 Ala324Thr and Glu655Asp mutations associated with TCMDC-143345 resistance are located  
498 in the protein's oligomerisation interface and 'Hinge 1' region, respectively, two regions that  
499 are essential for general DRP (and thus LdoDLP1) function. Hence, these mutations are likely

500 to influence protein function, which in turn might explain the observed impact on  
501 mitochondrial dynamics within the TCMDC-143345 resistant *L. donovani* parasites.

502 Whether LdoDLP1 is the molecular target of TCMDC-143345 or is part of a coping  
503 mechanism without being the direct target of TCMDC-143345 remains to be investigated. In  
504 this latter hypothesis, the LdoDLP1 mutations may have arisen to alleviate the drug's  
505 detrimental effect on parasite viability. Within this context, it is interesting to note that  
506 leishmanial DLP was also proposed to be involved in the resistance profile of antimony- and  
507 miltefosine-resistant *Leishmania infantum* (39). In this proteomic study, *L. infantum* DLP was  
508 found to be down-regulated in the antimony- and miltefosine-resistant strains, although no  
509 information was gathered with regards to possible mutations in the protein. In the former  
510 hypothesis (*i.e.*, LdoDLP1 is the molecular target of TCMDC-143345), the Ala324Thr and  
511 Glu655Asp mutations provide a direct escape to the drug's deadly mode of action through  
512 LdoDLP1 binding. This hypothesis can equally be supported by the MtMP results. As of day 2  
513 of drug exposure, we observed a drastic alteration in the Mitotracker RFUs for the WT  
514 parasite, whereas the Mitotracker RFUs remained unaffected for the resistant lines. This  
515 could be explained by the following scenarios: i) the LdoDLP1 mutations in the DR lines  
516 prevent the compound from binding LdoDLP1 (*i.e.*, the mutations are located in the binding  
517 site for TCMDC-143345) or ii) they compensate for the effect that drug binding may have on  
518 LdoDLP1's function in mitochondrial dynamics (TCMDC-143345 binds another LdoDLP1  
519 ligand binding site). Clearly, in this hypothesis, the elucidation of the binding site and  
520 molecular interactions responsible for affinity and specific recognition between LdoDLP1 and  
521 TCMDC-143345 would shed relevant insights to be exploited in the design of new  
522 compounds with optimised potency. This would be especially interesting since DLPs from



523 protozoan parasites are considered as drug targets because of their essentiality with regards  
524 to cell division and parasite growth (33).

525 Altogether, the results gathered in present study demonstrate the practical relevance of  
526 prospective DR studies. The time-to-resistance here shown for TCMDC-143345 is  
527 encouraging in the context of the shelf-life of that compound, but this should be  
528 complemented by *in vivo* studies. The demonstrated engagement of the unique leishmanial  
529 DLP in the resistance of *L. donovani* to TCMDC-143345 will allow the development of  
530 diagnostics targeting that gene to accompany further pre-clinical and clinical studies, if any  
531 and it will also guide further investigation on the mode of action. The absence of cross-  
532 resistance with other drugs currently used in clinical practice qualifies TCMDC-143345 for  
533 future combination therapy if the compound would reach that stage. It is still early to assess  
534 whether this mechanism of resistance is relevant against other chemical classes, yet the  
535 resistant strains selected become powerful tools to be employed with new chemical classes  
536 to ascertain whether they share biological space in terms of mode of action or resistance.

537

### 538 **Acknowledgements**

539 This study has received funding from the European Union's Horizon 2020 research and  
540 innovation programme under the Marie Skłodowska-Curie grant agreement N° 642609 and  
541 the Flemish Fund for Scientific Research (12Q8115N). MJ is supported by the Flemish Fund  
542 for Scientific Research (postdoctoral fellowship). GN is supported by the Flemish Ministry of  
543 Science and Innovation (SOFI Grant MADLEI). JAC, MB and MS are supported by the  
544 Wellcome Trust via their core funding of the Wellcome Trust Sanger Institute (grant 206194).  
545 The funders had no role in study design, data collection and interpretation, or the decision  
546 to submit the work for publication.

547

548

549 **References**

550

551 1. Caljon G, De Muylder G, Durnez L, Jennes W, Vanaerschot M, Dujardin J-C. 2016. Alice  
552 in microbes' land: adaptations and counter-adaptations of vector-borne parasitic protozoa  
553 and their hosts. *FEMS Microbiol Rev* 40:664–85.

554 2. Hefnawy A, Berg M, Dujardin JC, De Muylder G. 2017. Exploiting Knowledge on  
555 *Leishmania* Drug Resistance to Support the Quest for New Drugs. *Trends Parasitol* 33:162–  
556 174.

557 3. Hefnawy A, Cantizani J, Peña I, Manzano P, Rijal S, Dujardin JC, De Muylder G, Martin  
558 J. 2018. Importance of secondary screening with clinical isolates for anti-leishmania drug  
559 discovery. *Sci Rep* 8: 11765.

560 4. Peña I, Pilar Manzano M, Cantizani J, Kessler A, Alonso-Padilla J, Bardera AI, Alvarez E,  
561 Colmenarejo G, Cotillo I, Roquero I, de Dios-Anton F, Barroso V, Rodriguez A, Gray DW,  
562 Navarro M, Kumar V, Sherstnev A, Drewry DH, Brown JR, Fiandor JM, Julio Martin J. 2015.  
563 New compound sets identified from high throughput phenotypic screening against three  
564 kinetoplastid parasites: An open resource. *Sci Rep* 5:8771.

565 5. Dumetz F, Imamura H, Sanders M, Seblova V, Myskova J, Pescher P. 2017.  
566 Modulation of Aneuploidy in *Leishmania* In Vitro and In Vivo Environments and Its. *MBio*  
567 8:e00599-17.

568 6. Seblova V, Dujardin J-C, Rijal S, Domagalska M, Volf P. 2019. ISC1, a new *Leishmania*  
569 *donovani* population emerging in the Indian sub-continent: Vector competence of  
570 *Phlebotomus argentipes*. *Infect Genet Evol* 76:104073.

- 571 7. Dumetz F, Cuypers B, Imamura H, Zander D, D'Haenens E, Maes I, Domagalska MA,  
572 Clos J, Dujardin J-C, De Muylder G. 2018. Molecular Preadaptation to Antimony Resistance in  
573 *Leishmania donovani* on the Indian Subcontinent. *mSphere* 3:e00548-17.
- 574 8. Shaw CD, Lonchamp J, Downing T, Imamura H, Freeman TM, Cotton JA, Sanders M,  
575 Blackburn G, Dujardin JC, Rijal S, Khanal B, Illingworth CJR, Coombs GH, Carter KC. 2016. In  
576 vitro selection of miltefosine resistance in promastigotes of *Leishmania donovani* from  
577 Nepal: Genomic and metabolomic characterization. *Mol Microbiol* 99:1134–1148.
- 578 9. Kozarewa I, Ning Z, Quail MA, Sanders MJ, Berriman M, Turner DJ. 2009.  
579 Amplification-free Illumina sequencing-library preparation facilitates improved mapping and  
580 assembly of (G+C)-biased genomes. *Nat Methods* 6:291–295.
- 581 10. Bronner IF, Quail MA, Turner DJ, Swerdlow H. 2014. Improved Protocols for Illumina  
582 Sequencing. *Curr Protoc Hum Genet* 80:18.2.1-42.
- 583 11. Imamura H, Downing T, van den Broeck F, Sanders MJ, Rijal S, Sundar S, Mannaert A,  
584 Vanaerschot M, Berg M, de Muylder G, Dumetz F, Cuypers B, Maes I, Domagalska M,  
585 Decuypere S, Rai K, Uranw S, Bhattarai NR, Khanal B, Prajapati VK, Sharma S, Stark O,  
586 Schönián G, de Koning HP, Settimo L, Vanhollebeke B, Roy S, Ostyn B, Boelaert M, Maes L,  
587 Berriman M, Dujardin JC, Cotton JA. 2016. Evolutionary genomics of epidemic visceral  
588 leishmaniasis in the Indian subcontinent. *Elife* 5:e12613.
- 589 12. Tihon E, Imamura H, Dujardin J-C, Van Den Abbeele J, Van den Broeck F. 2017.  
590 Discovery and genomic analyses of hybridization between divergent lineages of  
591 *Trypanosoma congolense*, causative agent of Animal African Trypanosomiasis. *Mol Ecol*  
592 26:6524–6538.

- 593 13. Lee S, Abecasis GR, Boehnke M, Lin X. 2014. Rare-variant association analysis: Study  
594 designs and statistical tests. *Am J Hum Genet.* 95: 5-23
- 595 14. Beneke T, Madden R, Makin L, Valli J, Sunter J, Gluenz E. 2017. A CRISPR Cas9 high-  
596 throughput genome editing toolkit for kinetoplastids. *R Soc Open Sci* 4:1–16.
- 597 15. Van Meirvenne N, Janssens PG, Magnus E. 1975. Antigenic variation in syringe  
598 passaged populations of *Trypanosoma (Trypanozoon) brucei*. 1. Rationalization of the  
599 experimental approach. *Ann Soc Belg Med Trop (1920)* 55:1–23.
- 600 16. Katoh K, Misawa K, Kuma KI, Miyata T. 2002. MAFFT: A novel method for rapid  
601 multiple sequence alignment based on fast Fourier transform. *Nucleic Acids Res* 30:3059–  
602 3066.
- 603 17. Guindon Stéphane, Dufayard Jean-François, Lefort Vincent, Anisimova Maria, Hordijk  
604 Wim, Gascuel Olivier. 2010. New algorithms and methods to estimate maximum-likelihood  
605 phylogenies: assessing the performance of PhyML 3.0 - PubMed. *Syst Biol* 59:307–321.
- 606 18. Sali A, Blundell T. 1994. Sali, A. & Blundell, T. L. Comparative modelling by satisfaction  
607 of spatial restraints. *J. Mol. Biol.* 234, 779-815.
- 608 19. Fröhlich C, Grabiger S, Schwefel D, Faelber K, Rosenbaum E, Mears J, Rocks O,  
609 Daumke O. 2013. Structural insights into oligomerization and mitochondrial remodelling of  
610 dynamin 1-like protein. *EMBO J* 32:1280–92.
- 611 20. Ford MGJ, Jenni S, Nunnari J. 2011. The crystal structure of dynamin. *Nature*  
612 477:561–6.

- 613 21. Reubold TF, Faelber K, Plattner N, Posor Y, Ketel K, Curth U, Schlegel J, Anand R,  
614 Manstein DJ, Noé F, Haucke V, Daumke O, Eschenburg S. 2015. Crystal structure of the  
615 dynamin tetramer. *Nature* 525:404–408.
- 616 22. Faelber K, Posor Y, Gao S, Held M, Roske Y, Schulze D, Haucke V, Noé F, Daumke O.  
617 2011. Crystal structure of nucleotide-free dynamin. *Nature* 477:556–562.
- 618 23. Goddard TD, Huang CC, Meng EC, Pettersen EF, Couch GS, Morris JH, Ferrin TE. 2018.  
619 UCSF ChimeraX: Meeting modern challenges in visualization and analysis. *Protein Sci* 27:14–  
620 25.
- 621 24. Morgan GW, Goulding D, Field MC. 2004. The single dynamin-like protein of  
622 *Trypanosoma brucei* regulates mitochondrial division and is not required for endocytosis. *J*  
623 *Biol Chem* 279:10692–701.
- 624 25. Chen H, Chomyn A, Chan DC. 2005. Disruption of fusion results in mitochondrial  
625 heterogeneity and dysfunction. *J Biol Chem* 280:26185–26192.
- 626 26. Giacomello M, Pyakurel A, Glytsou C, Scorrano L. 2020. The cell biology of  
627 mitochondrial membrane dynamics. *Nat Rev Mol Cell Biol.* 21: 204-224
- 628 27. Kalia R, Wang RYR, Yusuf A, Thomas P V., Agard DA, Shaw JM, Frost A. 2018.  
629 Structural basis of mitochondrial receptor binding and constriction by DRP1. *Nature*  
630 558:401–405.
- 631 28. Faelber K, Dietrich L, Noel JK, Wollweber F, Pfitzner AK, Mühleip A, Sánchez R,  
632 Kudryashev M, Chiaruttini N, Lilie H, Schlegel J, Rosenbaum E, Hessenberger M, Matthaeus  
633 C, Kunz S, von der Malsburg A, Noé F, Roux A, van der Laan M, Kühlbrandt W, Daumke O.

- 634 2019. Structure and assembly of the mitochondrial membrane remodelling GTPase Mgm1.  
635 Nature. 571: 429-433
- 636 29. Gao S, Von der Malsburg A, Dick A, Faelber K, Schröder GF, Haller O, Kochs G,  
637 Daumke O. 2011. Structure of Myxovirus Resistance Protein A Reveals Intra- and  
638 Intermolecular Domain Interactions Required for the Antiviral Function. Immunity 35:514–  
639 525.
- 640 30. Chen Y, Zhang L, Graf L, Yu B, Liu Y, Kochs G, Zhao Y, Gao S. 2017. Conformational  
641 dynamics of dynamin-like MxA revealed by single-molecule FRET. Nat Commun 8: 15744.
- 642 31. Chappie JS, Mears JA, Fang S, Leonard M, Schmid SL, Milligan RA, Hinshaw JE, Dyda F.  
643 2011. A pseudoatomic model of the dynamin polymer identifies a hydrolysis-dependent  
644 powerstroke. Cell 147:209–222.
- 645 32. Shaw CD, Imamura H, Downing T, Blackburn G, Westrop GD, Cotton JA, Berriman M,  
646 Sanders M, Rijal S, Coombs GH, Dujardin JC, Carter KC. 2019. Genomic and Metabolomic  
647 Polymorphism among Experimentally Selected Paromomycin-Resistant *Leishmania donovani*  
648 Strains. Antimicrob Agents Chemother 64:e00904-19.
- 649 33. Voleman L, Doležal P. 2019. Mitochondrial dynamics in parasitic protists. PLoS Pathog  
650 15:e1008008.
- 651 34. Melatti C, Pieperhoff M, Lemgruber L, Pohl E, Sheiner L, Meissner M. 2019. A unique  
652 dynamin-related protein is essential for mitochondrial fission in *Toxoplasma gondii*. PLoS  
653 Pathog 15:e1007512.
- 654 35. Benz C, Stribrna E, Hashimi H, Lukes J. 2017. Dynamin-like proteins in *Trypanosoma*  
655 *brucei*: A division of labour between two paralogs? PLoS One 12:e0177200.

- 656 36. Chanez AL, Hehl AB, Engstler M, Schneider A. 2006. Ablation of the single dynamin of  
657 *T. brucei* blocks mitochondrial fission and endocytosis and leads to a precise cytokinesis  
658 arrest. *J Cell Sci* 119:2968–2974.
- 659 37. Jakob M, Hoffmann A, Amodeo S, Peitsch C, Zuber B, Ochsenreiter T. 2016.  
660 Mitochondrial growth during the cell cycle of *Trypanosoma brucei* bloodstream forms. *Sci*  
661 *Rep* 6:36565.
- 662 38. Schneider A, Ochsenreiter T. 2018. Failure is not an option - mitochondrial genome  
663 segregation in trypanosomes. *J Cell Sci* 131:221820.
- 664 39. Vincent IM, Racine G, Légaré D, Ouellette M. 2015. Mitochondrial proteomics of  
665 antimony and miltefosine resistant *Leishmania infantum*. *Proteomes* 3:328–346.
- 666



667

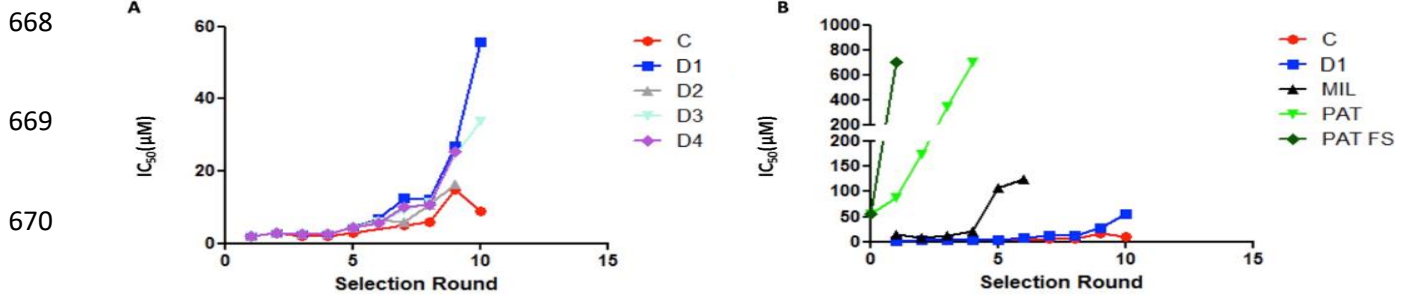

671

672

673 **Fig. 1. Time to resistance during selection experiments.** The IC<sub>50</sub> is shown in µM on the Y  
674 axis and selection round on the X axis (approx. 5 weeks per round) in (A) the different lines  
675 of LdBPK\_282 cl4 kept under pressure with TCMDC-143345, in (B) line C and D1 are  
676 compared with LdBPK\_282 cl4 selected for resistance to different known compounds  
677 (Miltefosine, MIL; potassium antimonyl tartrate, PAT); PAT FS, consisting in a 'flash' selection  
678 exposing the parasites directly to the highest concentration of the drug (7).

679

680

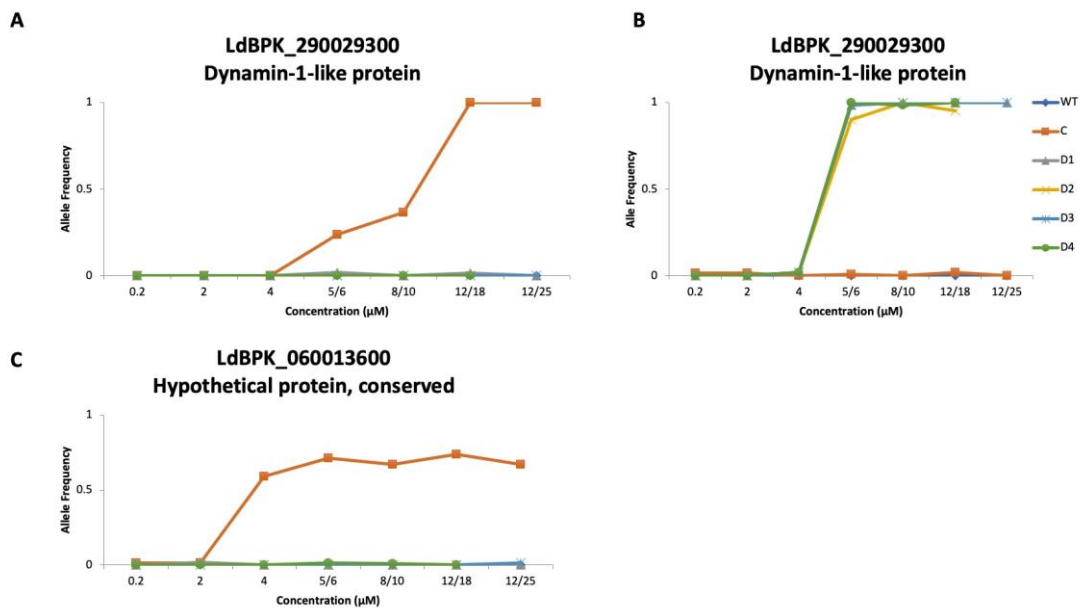

681

682

683 **Figure 2. Major SNPs and their allele frequency change observed during selection of**  
684 **TCMDC-143345-resistance. (A) C:T missense mutation in position Ld29: 1000024 and (B) C:A**  
685 **missense mutation in position Ld29:999029C, both in the gene encoding dynamin1-like**  
686 **protein (LdoDLP1, LdBPK\_290029300). (C) G:T missense mutation in position Ld06:353587 in**  
687 **a conserved hypothetical protein (LdBPK\_060013600)**

688

689

690

691

692

693

694

695

696

697

698

699

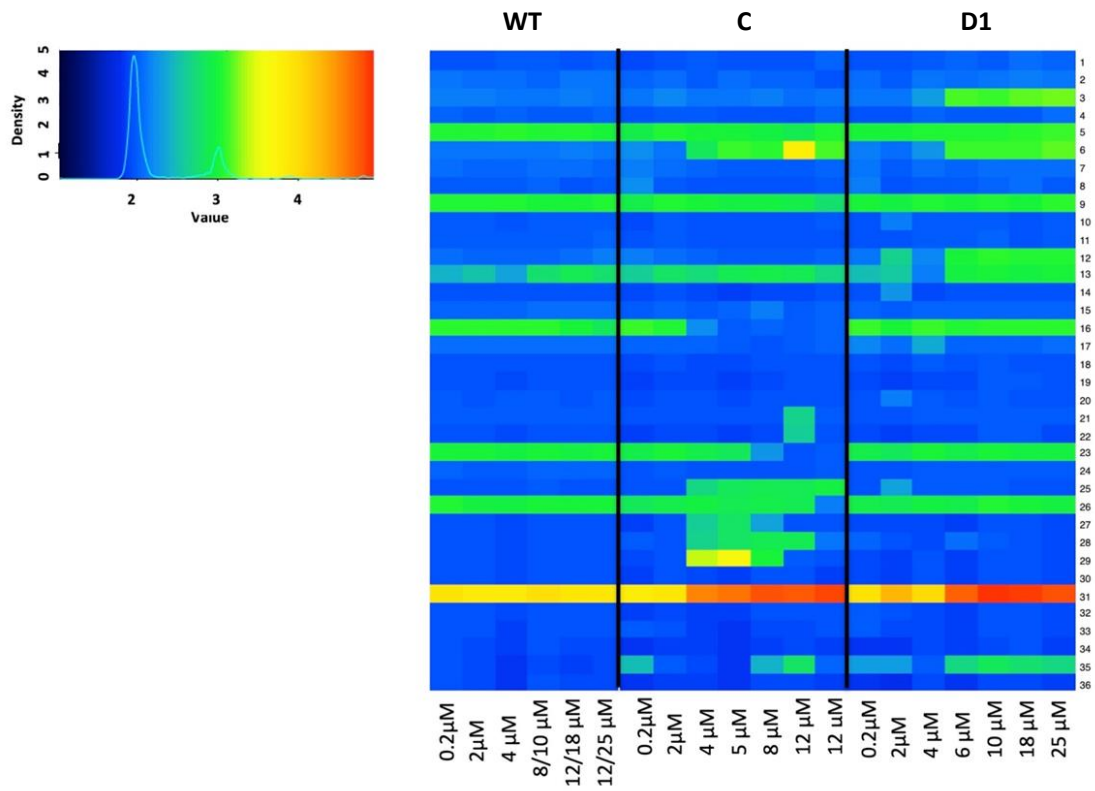

700 **Fig. 3. Somy changes in TCMDC-143345-resistant lines C and D1 and WT controls.** Heat map

701 representing the karyotype dynamics across the resistance selection of LdBPK\_282 cl4 to

702 TCMDC-143345. The color key shows the normalized chromosome read depth (S).

703

704

705

706

707

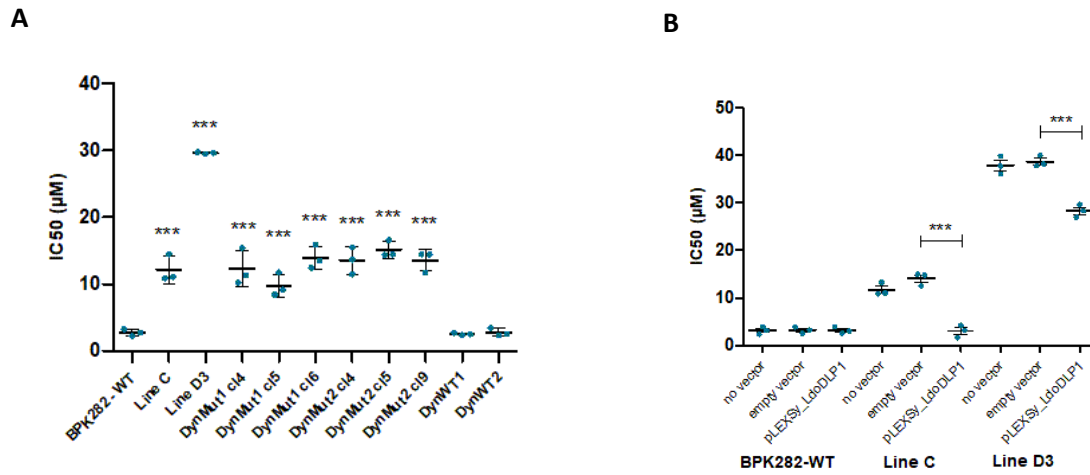

708 **Fig. 4. A.** Susceptibility of 3 clones with the Ala324Thr (DynMut1 c4, c5 and c6) or the  
709 Glu655Asp (DynMut2 c4, c5 and c9) LdDLP1 mutations introduced by CRISPR-Cas9. The  
710 WT LdBPK\_282 c14 and the unselected parasites transfected with DynWT1 or DynWT2 sgRNA  
711 and DNA templates were included as controls. **B.** Susceptibility of Lines C and D when  
712 overexpressing the WT LdDLP1 gene. Lines represent the average and standard deviation of  
713 the three independent replicates (dots) of each experiment. \*\*\* =  $p \leq 0.001$  (ANOVA with  
714 Bonferroni's Multiple Comparison Test).

715

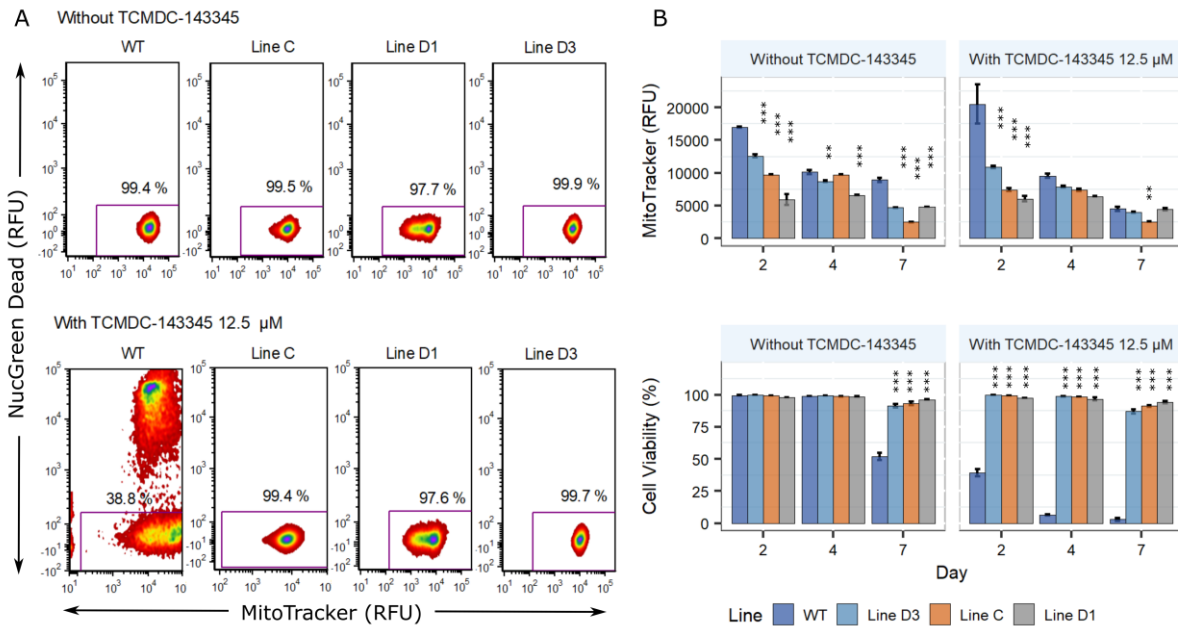

716

717

718

719 **Figure 5.** Mitochondrial membrane potential (MtMP) and cell viability of TCMDC-143345-  
 720 resistant lines in promastigotes. (A) Density plots of the MtMP as measured by the  
 721 fluorescence of the MitoTracker DeepRed and the percentage of cell viability as measured by  
 722 the fluorescence of the NucGreen Dead. One plot of each line 2 days post treatment with  
 723 12.5 μM of TCMDC-143345 and their respective controls are shown. (B) MtMP in WT and  
 724 resistant lines on days 2, 4 and 7 post treatment. All the resistant lines had diminished MtMP  
 725 in the logarithmic phase of culture (Day 2) in comparison to the wildtype in presence or  
 726 absence of TCMDC-143345. The differences between wild type and resistant lines were  
 727 smaller in later days of incubation. Each bar represents the mean ± SEM of three biological  
 728 replicates. Within each day, the asterisk in the top of the bars represent significant  
 729 differences between the resistant line in comparison to the wild type (Fisher's LSD test,  $P <$   
 730 0.05).

731

732

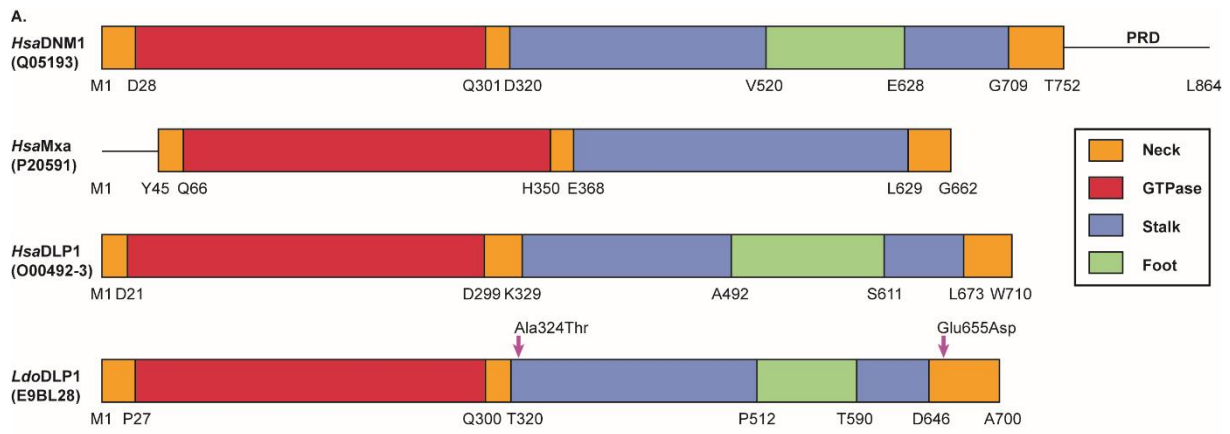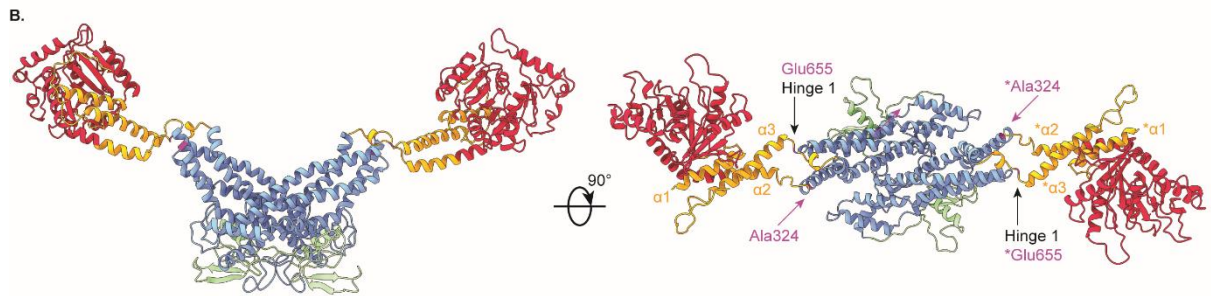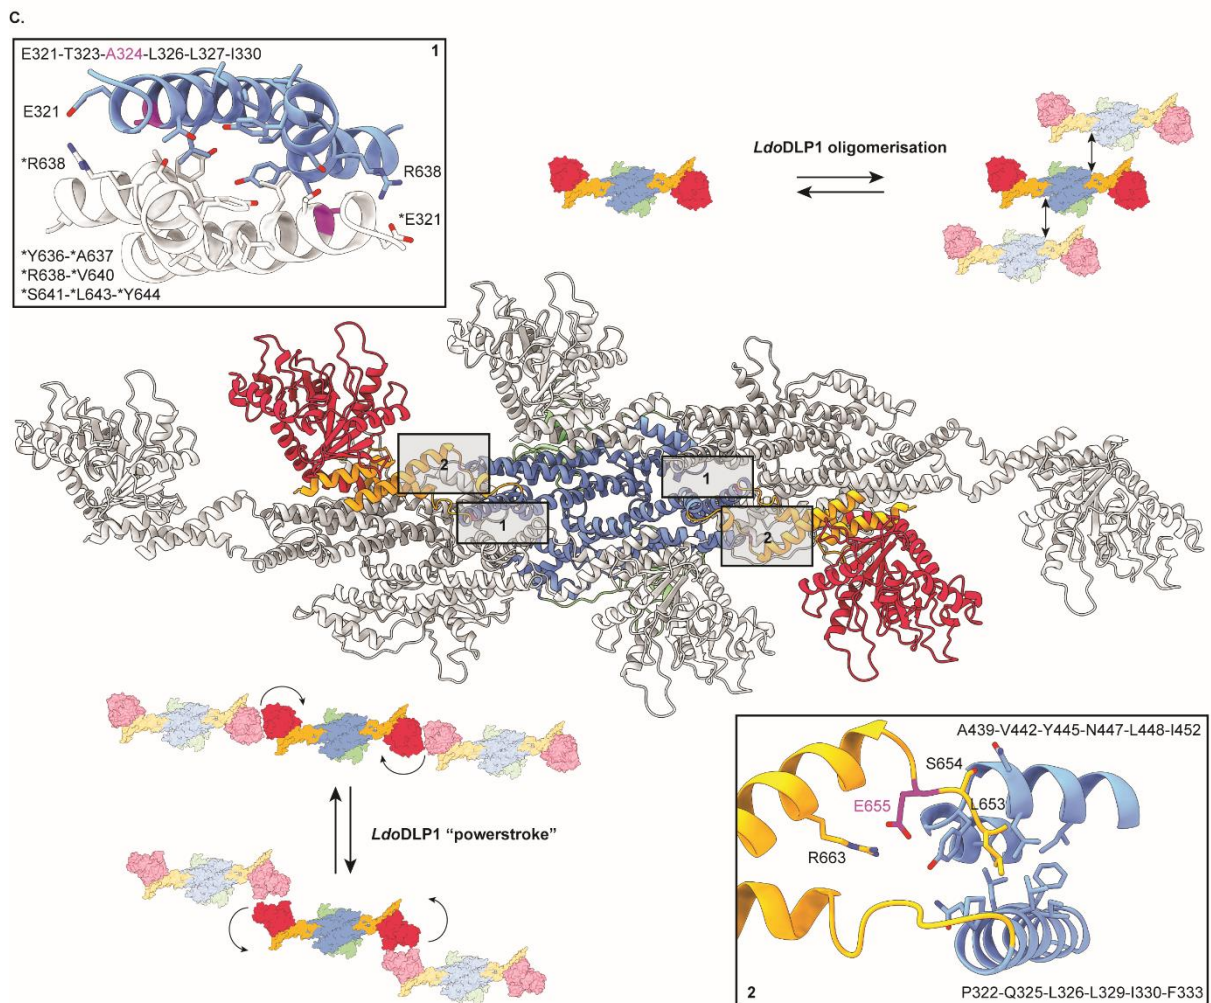

733

734 **Figure 6. A homology model of LdoDLP1 suggests a molecular basis for the impact of**  
735 **TCMDC-143345 resistance mutations on protein function.** (A.) Schematic representation of  
736 the primary sequences of *Homo sapiens* dynamin 1 (*HsaDNM1*), *H. sapiens* myxovirus  
737 resistance protein 1 (*HsaMxA*), *H. sapiens* dynamin-like protein 1 (*HsaDLP1*) and LdoDLP1.  
738 The Uniprot identifiers are shown as well. The different domains are color-coded and their  
739 boundaries have been indicated. The LdoDLP1 Ala324Thr and Glu655Asp mutations  
740 associated with TCMDC-143345 resistance are indicated by the magenta arrows. (B.)  
741 Cartoon representation of the LdoDLP1 dimer homology model, color-coded as in panel A.  
742 The 3  $\alpha$ -helices of the neck domain, ‘Hinge 1’ and the positions of Ala324 and Glu655 have  
743 been indicated for convenience. ‘\*’ is employed to indicate the second protomer of the  
744 LdoDLP1 dimer. (C.) The center displays a model of a higher order oligomer of the LdoDLP1.  
745 The central dimer is color-coded as in panel A, whereas the other two dimers are depicted in  
746 gray for reasons of clarity. The regions containing the Ala324Thr and Glu655Asp mutations  
747 are indicated by boxes ‘1’ and ‘2’, respectively. The insets provide a close-up view of the  
748 molecular interactions in these boxed regions. Relevant amino acids are shown in a stick  
749 representation. Ala324 (colored magenta) is proposed to be a part of the higher order  
750 oligomerization interface of LdoDLP1 (box 1), while Glu655 (colored magenta) is likely to play  
751 an important role in LdoDLP1’s “powerstroke” (box 2). ‘\*’ is employed to indicate the second  
752 protomer of the LdoDLP1 dimer.

753

754
